# Supplementary material for: Suppression of ZIP8 expression is a common feature of cadmium-resistant and manganese-resistant RBL-2H3 cells
Source: Royal Society of Chemistry journal article supplement (doi:10.1039/c3mt00003f), 2013-01-01
Supplement: c3mt00003f.pdf [file c3mt00003f.pdf]

## Supplementary Figure. 1

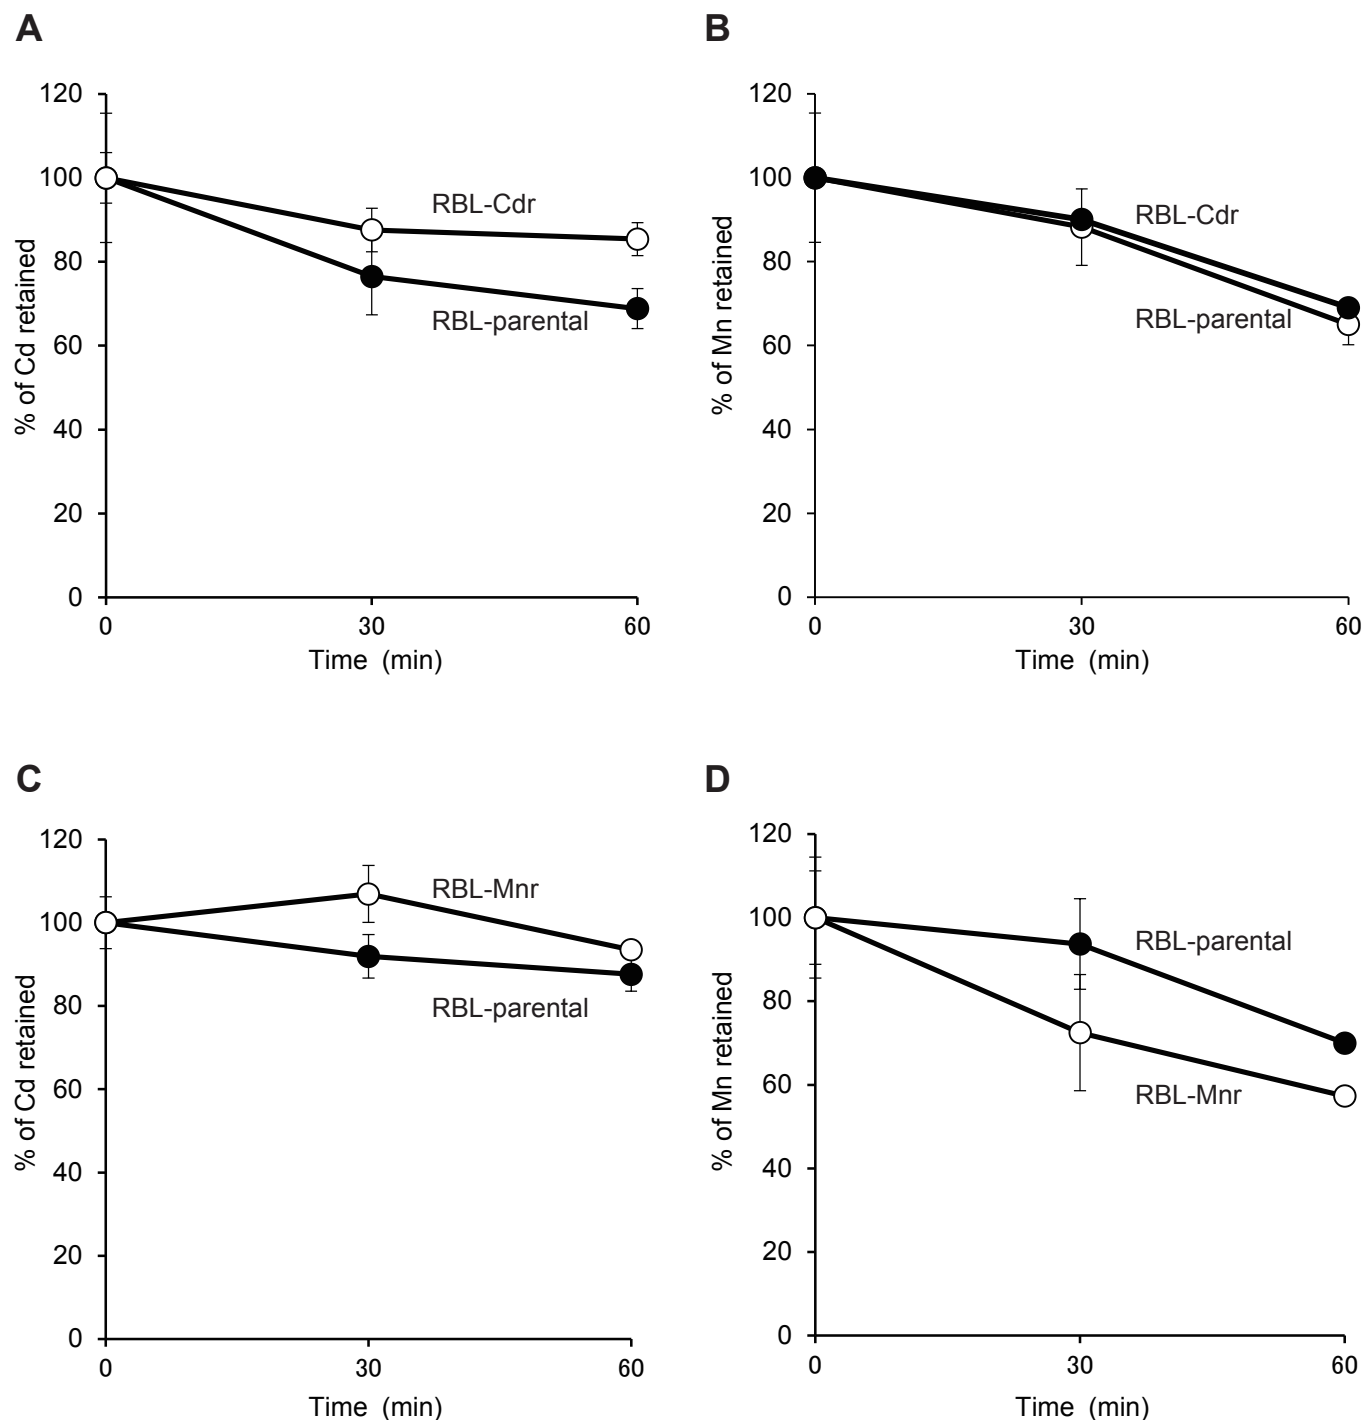

The efflux rates of cadmium and manganese in RBL-Cdr, RBL-Mnr, and parental RBL-2H3 cells. Cells were exposed to 1  $\mu$ M CdCl<sub>2</sub> or MnCl<sub>2</sub> for 2 h, washed with PBS containing 0.05% EDTA, and then incubated further with freshly supplemented metal-free medium. The concentrations of cadmium and manganese retained in the cells were determined 30 and 60min after the change of the medium by using tracers of <sup>109</sup>Cd and <sup>54</sup>Mn, respectively. Data are expressed as means  $\pm$  S.D.

A and B; Comparison of the efflux rates of cadmium (A) and mananese (B) between RBL-Cdr and parental RBL-2H3 cells.

C and D; Comparison of the efflux rates of cadmium (C) and manganese (D) between RBL-Mnr and parental RBL-2H3 cells.
